# Supplementary material
Source: PubMed Central journal article supplement (PMC4024861)
Supplement: 1404179111_pnas.201404179SI.pdf [file 1404179111_pnas.201404179SI.pdf]

# Supporting Information

Chagas et al. 10.1073/pnas.1404179111

**Table S1. Oligonucleotide primers for gene amplification analyses**

| Name          | Sequence (5'-3')            | Purpose     |
|---------------|-----------------------------|-------------|
| TransE2rcF    | GGAGACTATTCCAAGATAACATTAACG | Genomic PCR |
| TransE2rcR    | AGTATCAGTGCTCGGAGGACAG      |             |
| eGFP-F        | GCTGGAATACAACACTACAACCTCGC  | Genomic PCR |
| eGFP-R        | CCAGCTGCACCGATCCATC         |             |
| Actin-F       | AAGGCCAACCGTGAGAAGATGACT    | Genomic PCR |
| Actin-R       | GCTCGTTGCCAATGGTGATAC       |             |
| Aegyptin-F    | CTATTCCAAGGTTTGTGATCATTTTC  | Genomic PCR |
| Aegyptin-R    | GATTGGTTTTTCGTTGGCTTGAGAC   |             |
| dsAegyptin-1F | AAGAAACGACCGATGATGCT        | qPCR        |
| dsAegyptin-1R | GCCAGCATCCTTATCTCCAG        | qPCR        |
| dsAegyptin-2F | TGTCTGGTAGGCATTGTGCT        |             |
| dsAegyptin-2R | AGACTCTCCGCTTGCATCAT        | qPCR        |
| Ribosomal S7R | TCGTGGACGCTTCTGCTTGTTG      |             |
| Ribosomal S7F | GGGACAAATCGGCCAGGCTATC      |             |

**Fig. S1.** Primary sequences of the pMos\_dsAegyptin and pMos\_30KExGM transgenes.

[Fig. S1](#)

**Fig. S2.** Genomic integration and expression in vivo of the dsAegyptin transgene. (A) The insertion of the transgene into the *Aedes aegypti* genome was analyzed by genomic PCR. Amplification reactions were carried out on genomic DNA from mosquitoes by using different primer sets as described in *Materials and Methods*. PCR products were resolved on agarose gel, stained with ethidium bromide and visualized under UV light. Amplicons corresponding to eGFP and dsAegyptin demonstrate the transgene genome insertion. (B) Expression of the reporter gene eGFP was analyzed under fluorescent microscopy. Accumulation of eGFP is limited to the lateral distal lobes of transgenic mosquitoes demonstrating the functionality of the transgene. (C) No fluorescence in the salivary glands of the parental strain Higgs was detected.

[Fig. S2](#)
