# Supplementary material
Source: PubMed Central journal article supplement (PMC4024861)
Supplement: 1404179111_pnas.1404179111.sfig01.pdf [file 1404179111_pnas.1404179111.sfig01.pdf]

pMos\_dsAegyptin

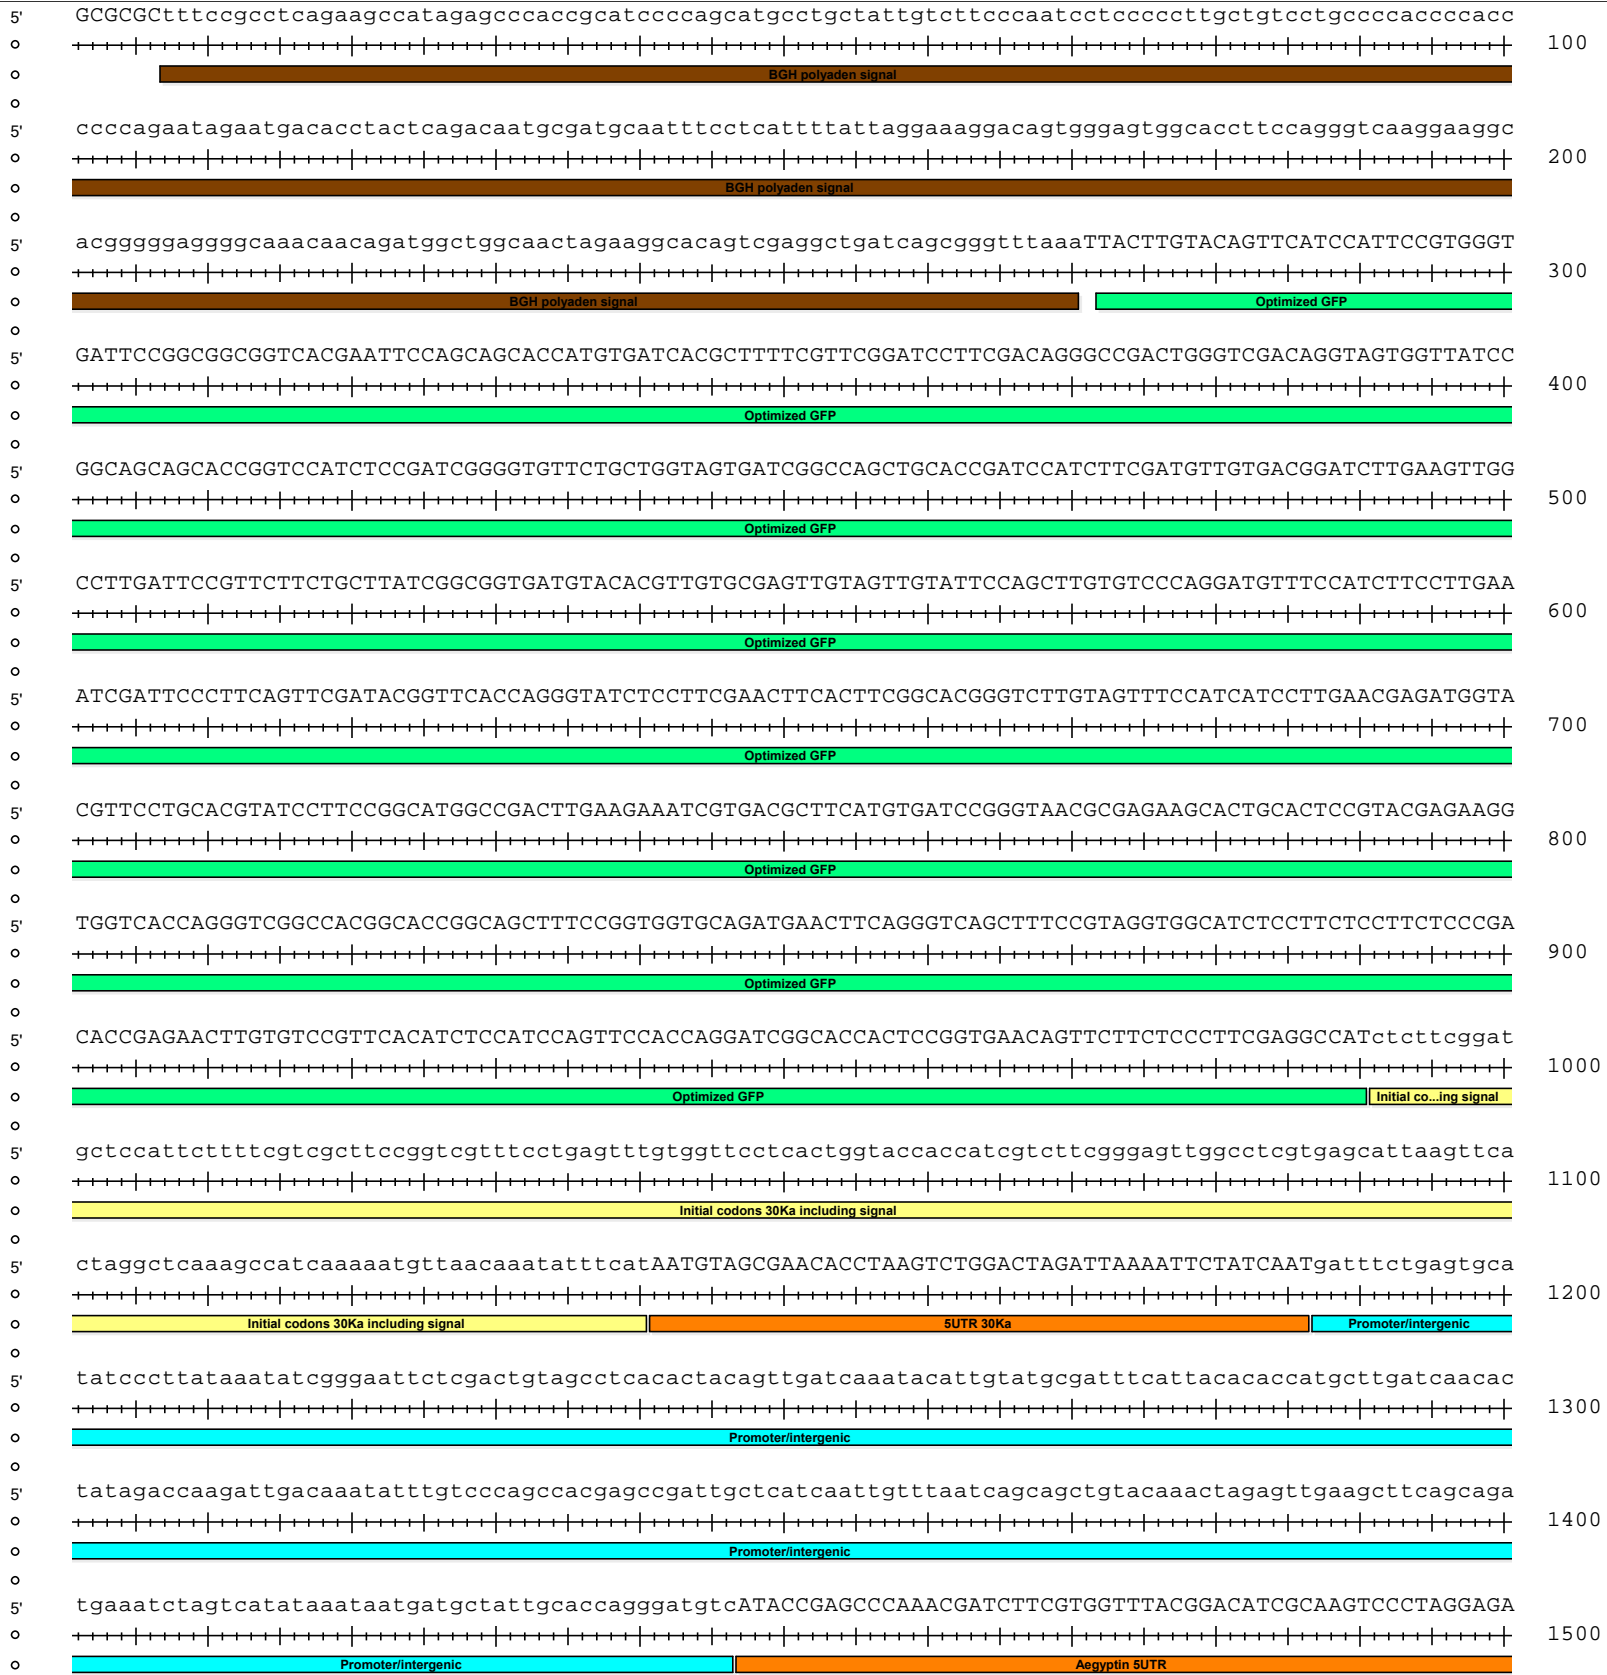

pMos\_dsAegyptin

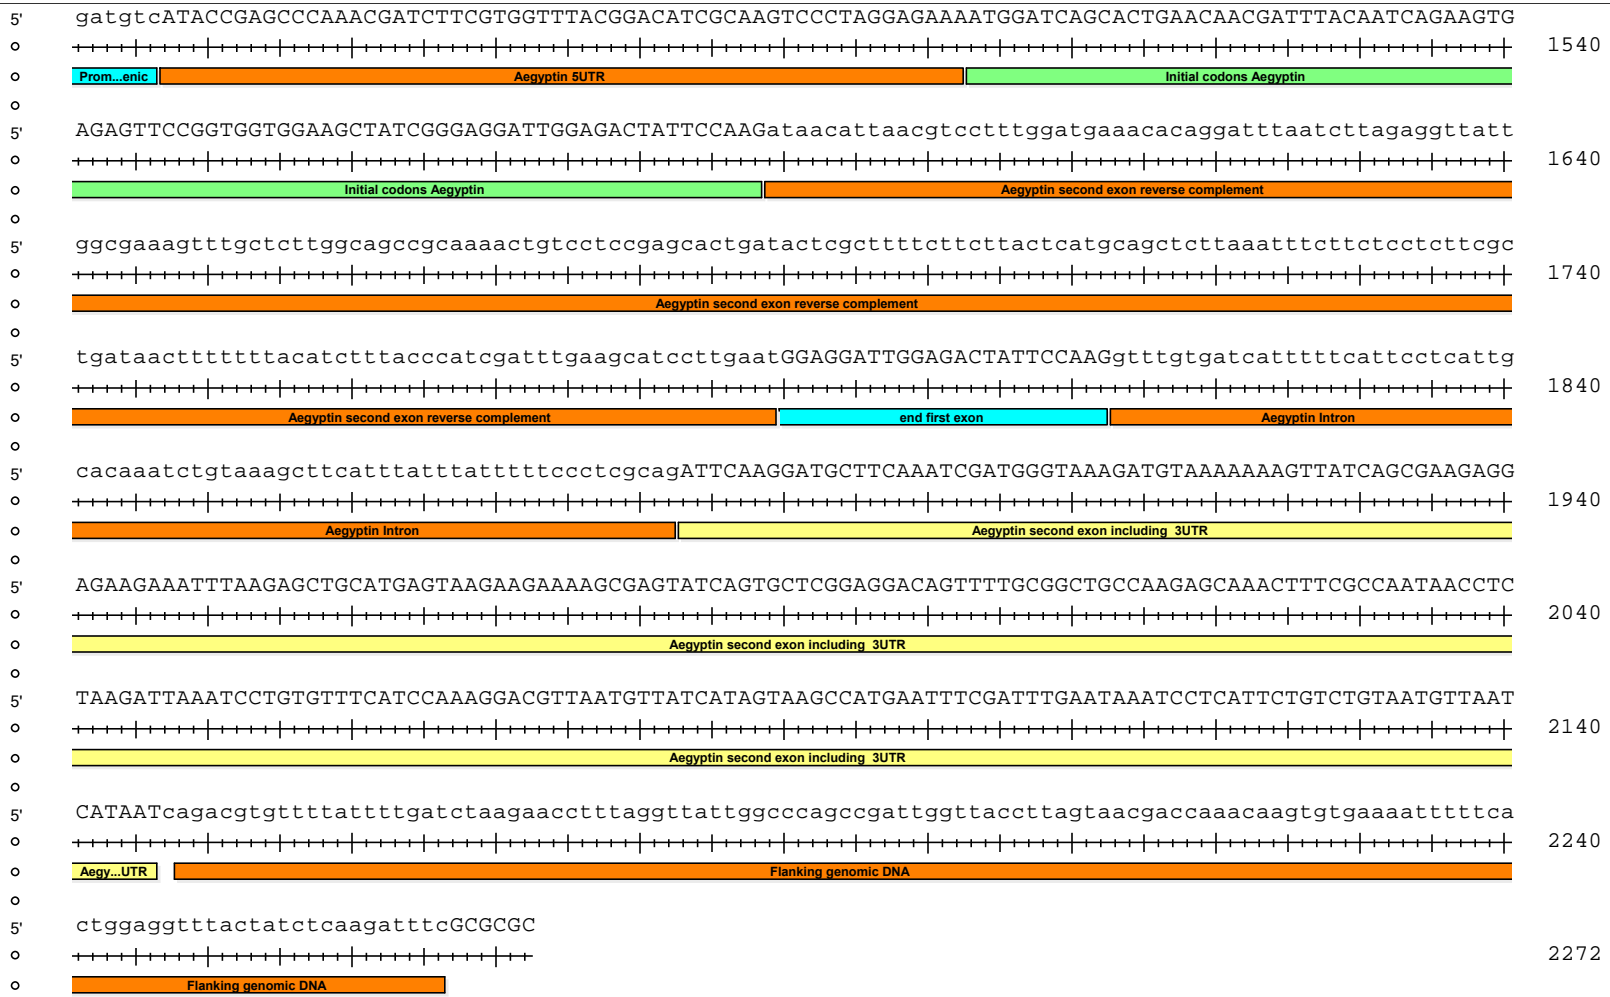

pMos30KExGM

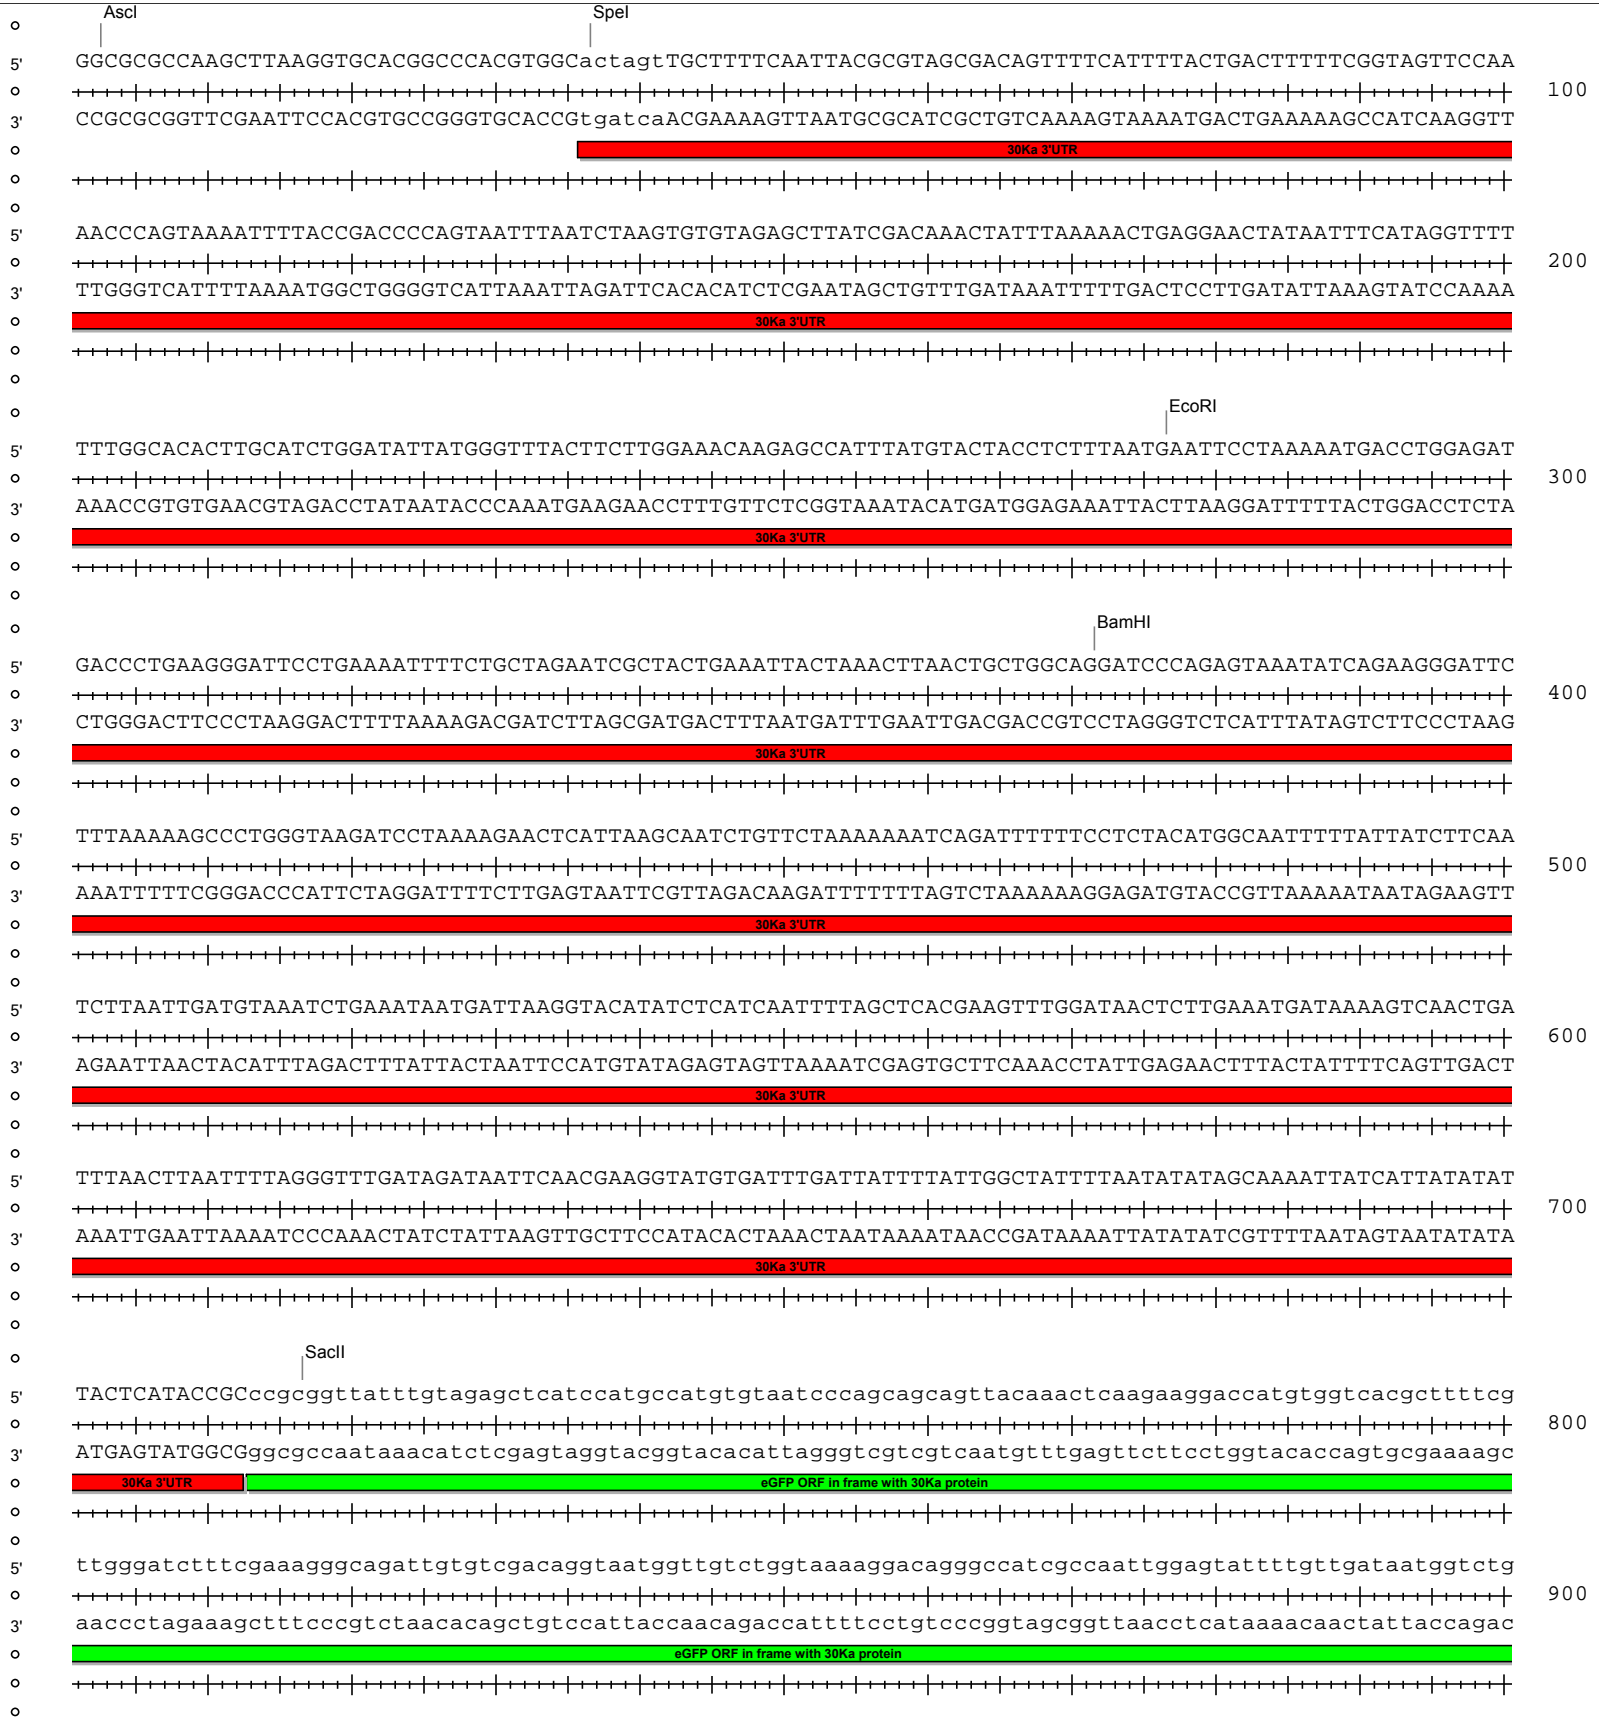

pMos30KExGM

BamHI

5' ctagt tgaac ggatcc atctt caatg ttgtg gccga atttt gaagt tagct ttgatt ccatt ctttt gttt gtct gcgct gatgt atacatt gtgtg agtt

1000

3' gat caact tgcct aggtaga agttaca acacc gctt aaaa actt caatc gaaact aaggt aagaaa caaac agacgg cactaca tatg taacac actcaa

eGFP ORF in frame with 30Ka protein

5' atagt tgtact cgagtt ttgtg tccg agaat gttt ccatt cttt taaa atcaata cttt taaact cgata cgatta aaca agggat cacctt caaact ttg

1100

3' tat caacat gagct caaac acagg ctctt taca aaggt agaa attt tagt tatgg aaaat tgag ctatg ctatt gttt cccat agtg gaag ttgaac

eGFP ORF in frame with 30Ka protein

5' actt cagc acgct tttgt agtt cccgt catct ttgaa agat atagt gtcgt tctgt acataaac cttc gggcat ggcact cttg aaaa agtcat gccgtt

1200

3' tga agtcgt gcgc agaacat caaggg cagt agaa cttt ctat atcac gcaagg acatg tat tggaa gcccgt accgt gaga actttt ttcagt acggcaa

eGFP ORF in frame with 30Ka protein

5' tcatat gatcc ggataaac gggaaa agcatt gaac accata agagaa agtagt gaca agtg ttggcc atggaac aggtag tttt ccag tagtg caaataaa

1300

3' agtata ctaggc ctattg cccttt ttcg taactt gtggat tctct ttcac tctg ttcaca accgg tacctt gtccat caaa aggtcat cacgtt tattt

eGFP ORF in frame with 30Ka protein

5' ttaagg gtaagct tttcc gtagt gcatcac cttc accct ctcc actgac agaaa atttt gtgcc attaac atcacc atctaat tcaaca agaattggg

1400

3' aaat tccc attc gaaagg catacat cgtagt ggaag tggg agaggt gactgt cttt taaac acgggt aattgt agtggt agatta agttgt tctta accc

eGFP ORF in frame with 30Ka protein

PstI

5' acaact ccagtg aaaagtt cttct ccttt gtagc catctg cagTGATCTAT TGAAGCAACGCAAGACGCGATCTTGGAACTCATTTTCGCAATTTTAT

1500

3' tgttg aggtc actttt caaga agagga aacgat cggtag acgtc ACTAGATAACCTTCGTTGCGTTCTGCGCTAGAACCTTGAGTAAAAGCGTTAAAATA

eGFP ORF in frame with 30Ka protein

30Ka exons 1 and 2 and intron 1

5' CCTGCACTGTGCTTCGATCTT GAGAACATTGATAAGCGTTGCTGTCCTTCTTGGCGGTACATTCCTTGAACCTTTTACGTCCTCTTCAATGGCCTTTTT

1600

3' GGACGTGACACGAAGCTAGAACTTGTAACTATTGCAACGACAGGAAGAACC GCCATGTAAGGAACTTGGGAAAATGCAGGAGAAGTTACCGGAAAAA

30Ka exons 1 and 2 and intron 1

5' CGCGTCGCCAACCATCGATTTGAAACATTTGCTATctgcaatttgggaaaat ttagtgcgttatgctcatgttatacgcgctatatgaccagaacaca

1700

3' GCGCAGCGGTTGGTAGCTAACTTTGTAAAGCGATAgacgttaaacccttttaatacacgcaatacagagtacaatatgcggcatatactggctttgtgt

30Ka intron

30Ka exons 1 and 2 and intron 1

5' aaCCTTCGAGAAGTCACCGCCGATCCGATTACGTCCACTATTGGGTTACGTAGATATCTCTGTATATCAGCGCGAGCTCGGACCGCTCGTGACCGTCC

1800

3' ttgGAAGCTCTTCAGTGGCCGCTAGGCTAATGCAGGTGATAACCCAATGCATCTATAGAGACATATAGTCGCCGCTCGAGCCTGGCGAGCACTGGCAGG

3...n

30Ka exons 1 and 2 and intron 1

pMos30KExGM

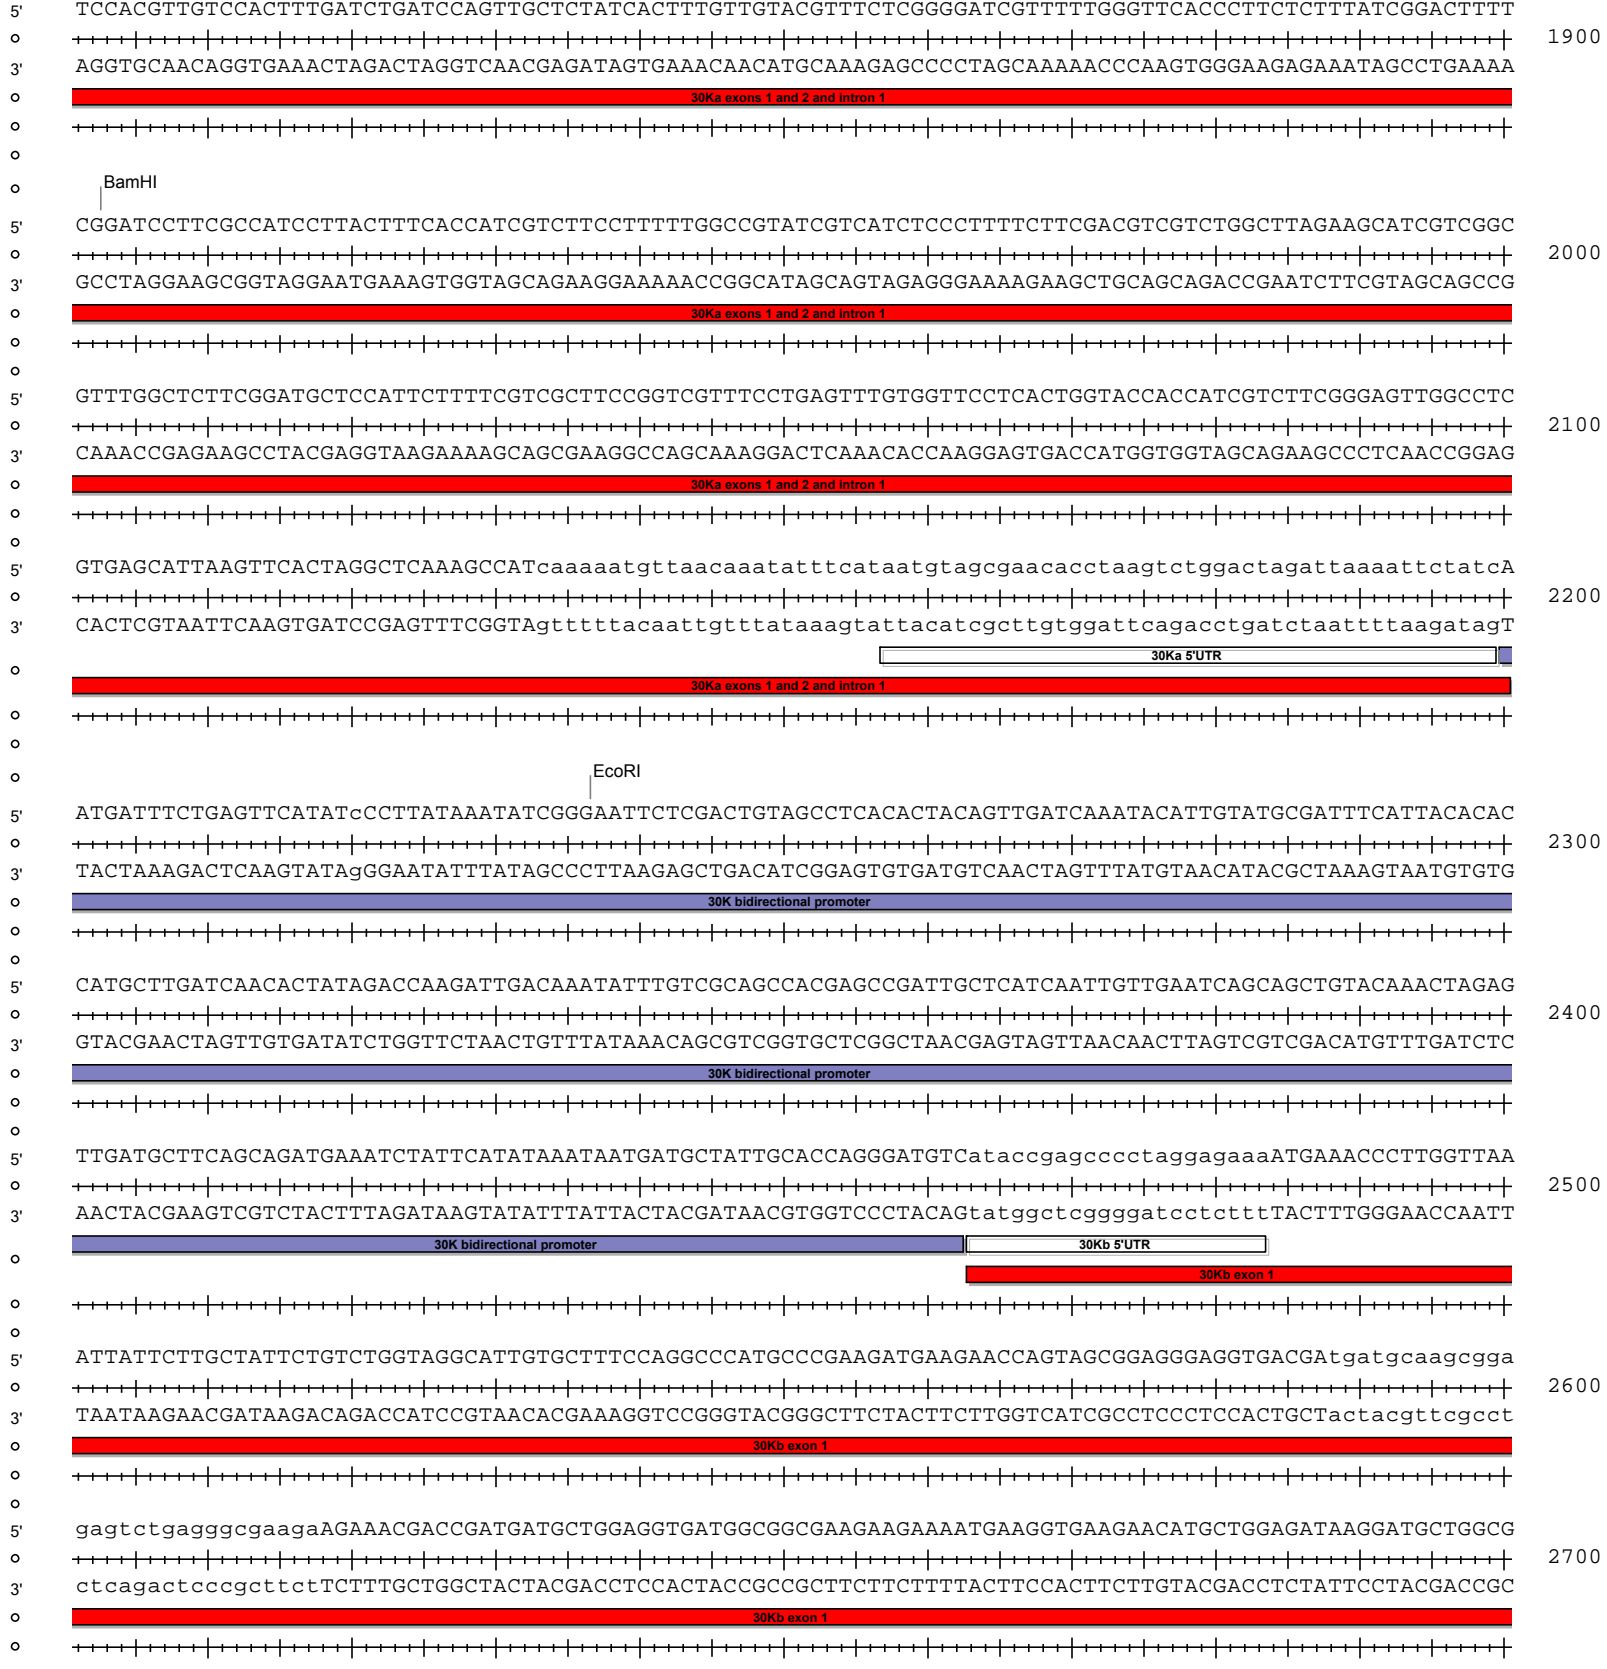

pMos30KExGM

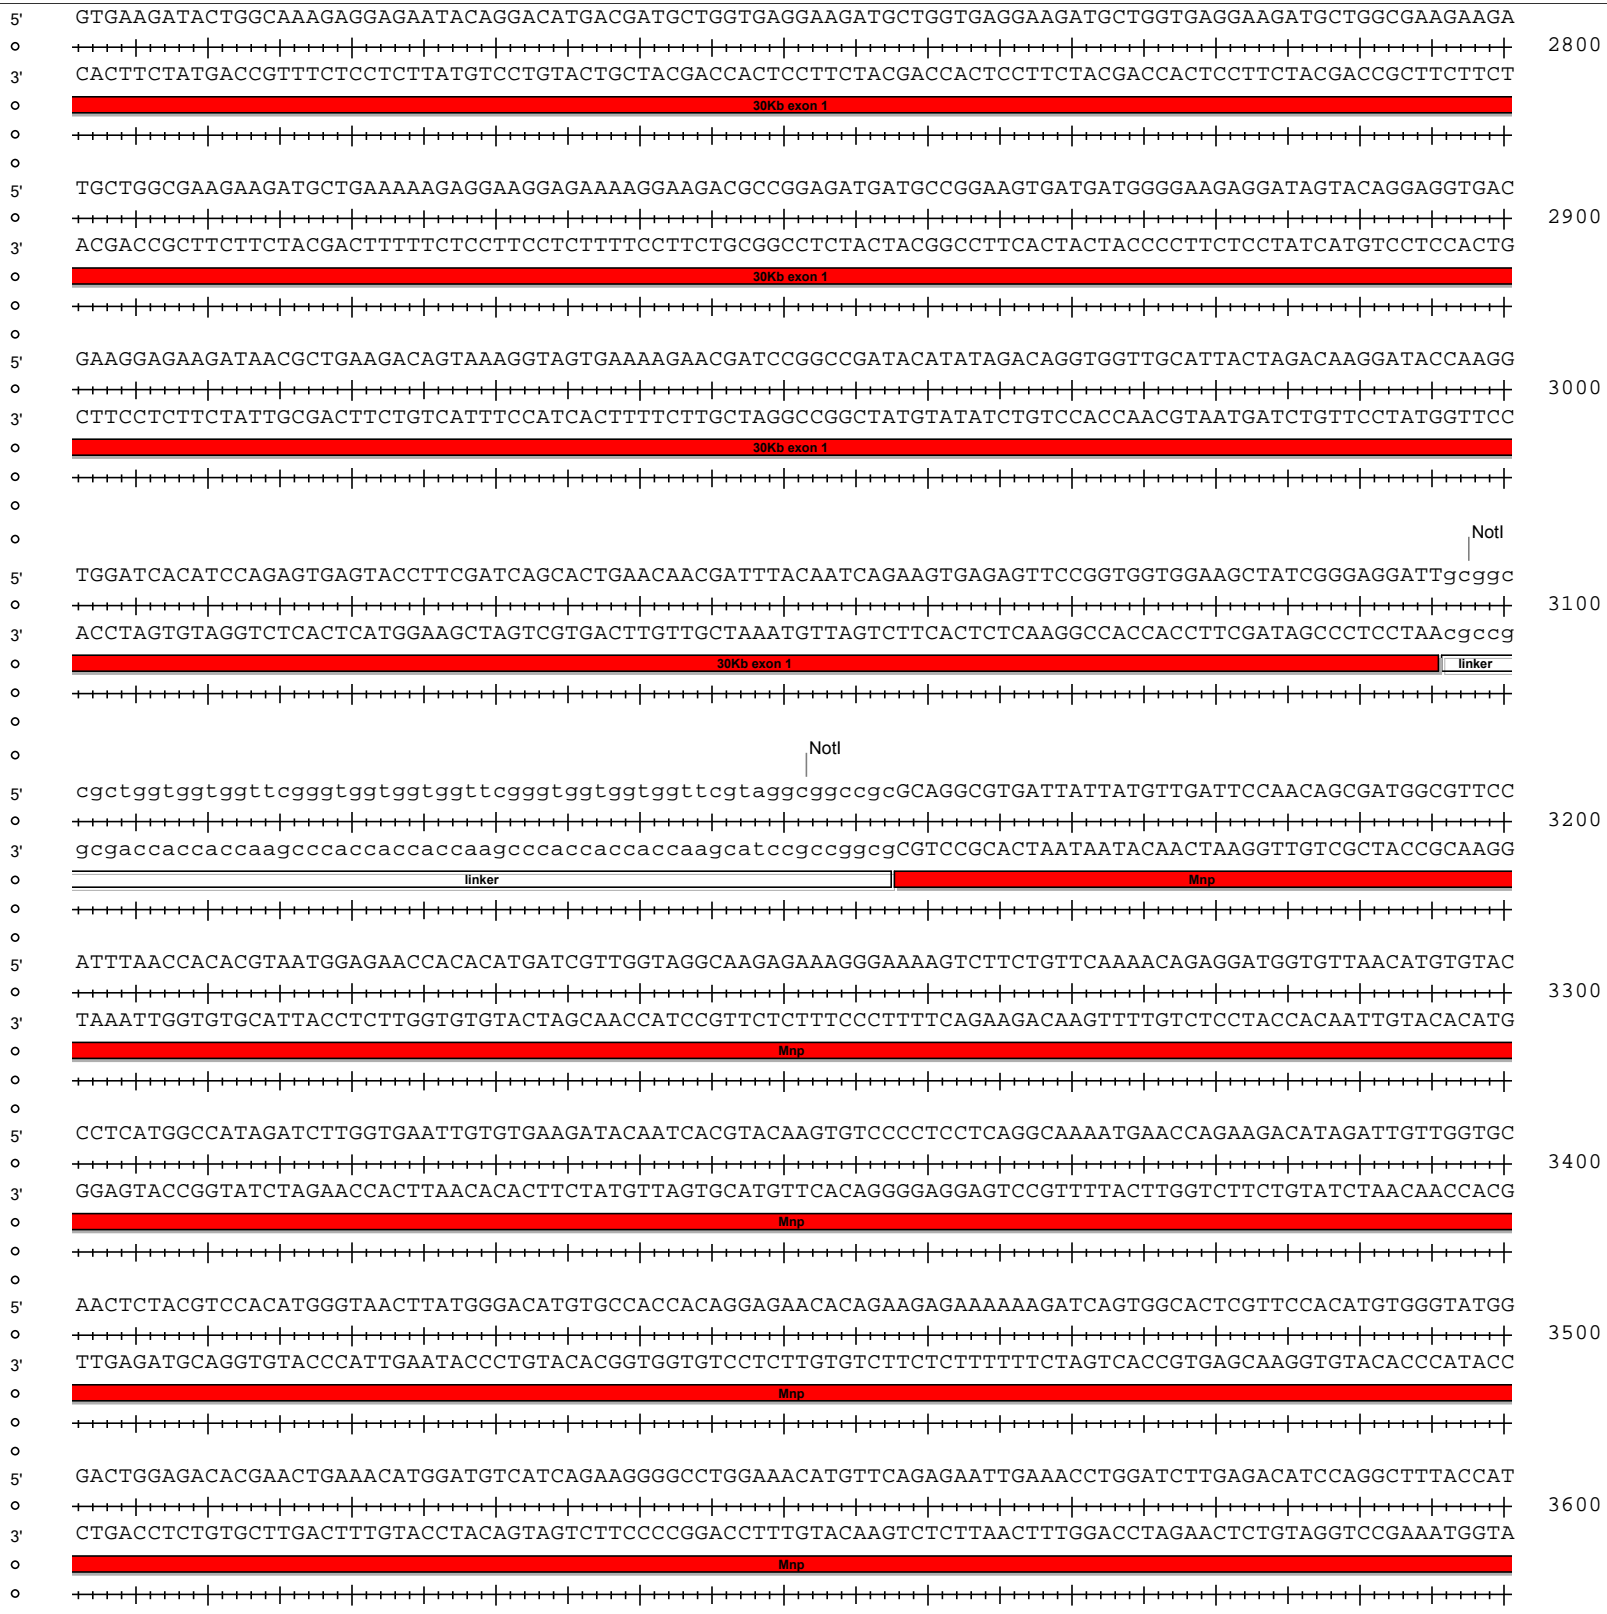

5' GTGAAGATACTGGCAAAGAGGAGAATACAGGACATGACGATGCTGGTGAGGAAGATGCTGGTGAGGAAGATGCTGGTGAGGAAGATGCTGGCGAAGAAGA  
 2800  
 3' CACTTCTATGACCGTTTCTCCTCTTATGTCTGTACTGCTACGACCACTCCTTCTACGACCACTCCTTCTACGACCACTCCTTCTACGACCGCTTCTTCT

30Kb exon 1

5' TGCTGGCGAAGAAGATGCTGAAAAAGAGGAAGGAGAAAAGGAAGACGCCGGAGATGATGCCGGAAGTATGATGGGGAAGAGGATAGTACAGGAGGTGAC  
 2900  
 3' ACGACCGCTTCTTCTACGACTTTTCTCCTTCTCTTTTCTTCTGCGGCCTCTACTACGGCCTTCACTACTACCCCTTCTCCTATCATGTCTCCACTG

30Kb exon 1

5' GAAGGAGAAGATAACGCTGAAGACAGTAAAGGTAGTGAAAAGAACGATCCGGCCGATACATATAGACAGGTGGTTGCATTACTAGACAAGGATACCAAGG  
 3000  
 3' CTTCCTTCTTATGCGACTTCTGTCATTTCCATCACTTTTCTTCTGCTAGGCCGGCTATGTATATCTGTCCACCAACGTAATGATCTGTTTCTATGTTCC

30Kb exon 1

5' TGGATCACATCCAGAGTGAGTACCTTCGATCAGCACTGAACAACGATTTACAATCAGAAGTGAGAGTTCGGTGGTGAAGCTATCGGGAGGATTgcggc  
 3100  
 3' ACCTAGTGTAGGTCTCACTCATGGAAGCTAGTCGTGACTTGTGCTAAATGTTAGTCTTCACTCTCAAGGCCACCACCTTCGATAGCCCTCCTAAcgccg

30Kb exon 1 linker

5' cgctggggtggtggttcggggtggtggtggttcggggtggtggttcgtaggcggccgcGCAGGCGTGATTATTATGTTGATTCCAACAGCGATGGCGTTCC  
 3200  
 3' cggaccaccaccaagcccaccaccaccaagcccaccaccaccaagcatccgcccggcgCGTCCGACTAATAATAACAATAAGGTTGTGCTACCGCAAGG

linker Msp

5' ATTTAACCACACGTAATGGGAGAACACACATGATCGTTGGTAGGCAAGAGAAAAGGAAAAGTCTTCTGTTCAAACAGAGGATGGTGTAAACATGTGTAC  
 3300  
 3' TAAATTGGTGTGCATTACCTCTTGGTGTGTACTAGCAACCATCCGTTCTCTTCCCTTTTTCAGAAGACAAGTTTGTCTCCTACCACAATTGTACACATG

Msp

5' CCTCATGGCCATAGATCTTGGTGAATTGTGTGAAGATAACAATCACGTACAAGTGTCCCTCCTCAGGCAAAATGAACCAGAAGACATAGATTGTTGGTGC  
 3400  
 3' GGAGTACCGGTATCTAGAACCCTTAACACACTTCTATGTTAGTGCATGTTTACAGGGGAGGAGTCCGTTTACTTGGTCTTCTGTATCTAACAACCACG

Msp

5' AACTCTACGTCCACATGGGTAACCTTATGGGACATGTGCCACCACAGGAGAACACAGAAGAGAAAAAAGATCAGTGGCACTCGTTCACATGTGGGTATGG  
 3500  
 3' TTGAGATGCAGGTGTACCCATTGAATACCCTGTACACGGTGGTGTCTCTTGTGCTTCTCTTTTTCTAGTACCGTGAGCAAGGTGTACACCATAACC

Msp

5' GACTGGAGACACGAACTGAAACATGGATGTCATCAGAAGGGGCTGGAAACATGTTTACAGAGAATTGAAACCTGGATCTTGAGACATCCAGGCTTTACCAT  
 3600  
 3' CTGACCTCTGTGCTTGACTTTGTACCTACAGTAGTCTTCCCAGGACCTTTGTACAAGTCTCTTAACTTTGGACCTAGAACCTGTAGGTCCGAAATGGTA

Msp

pMos30KExGM

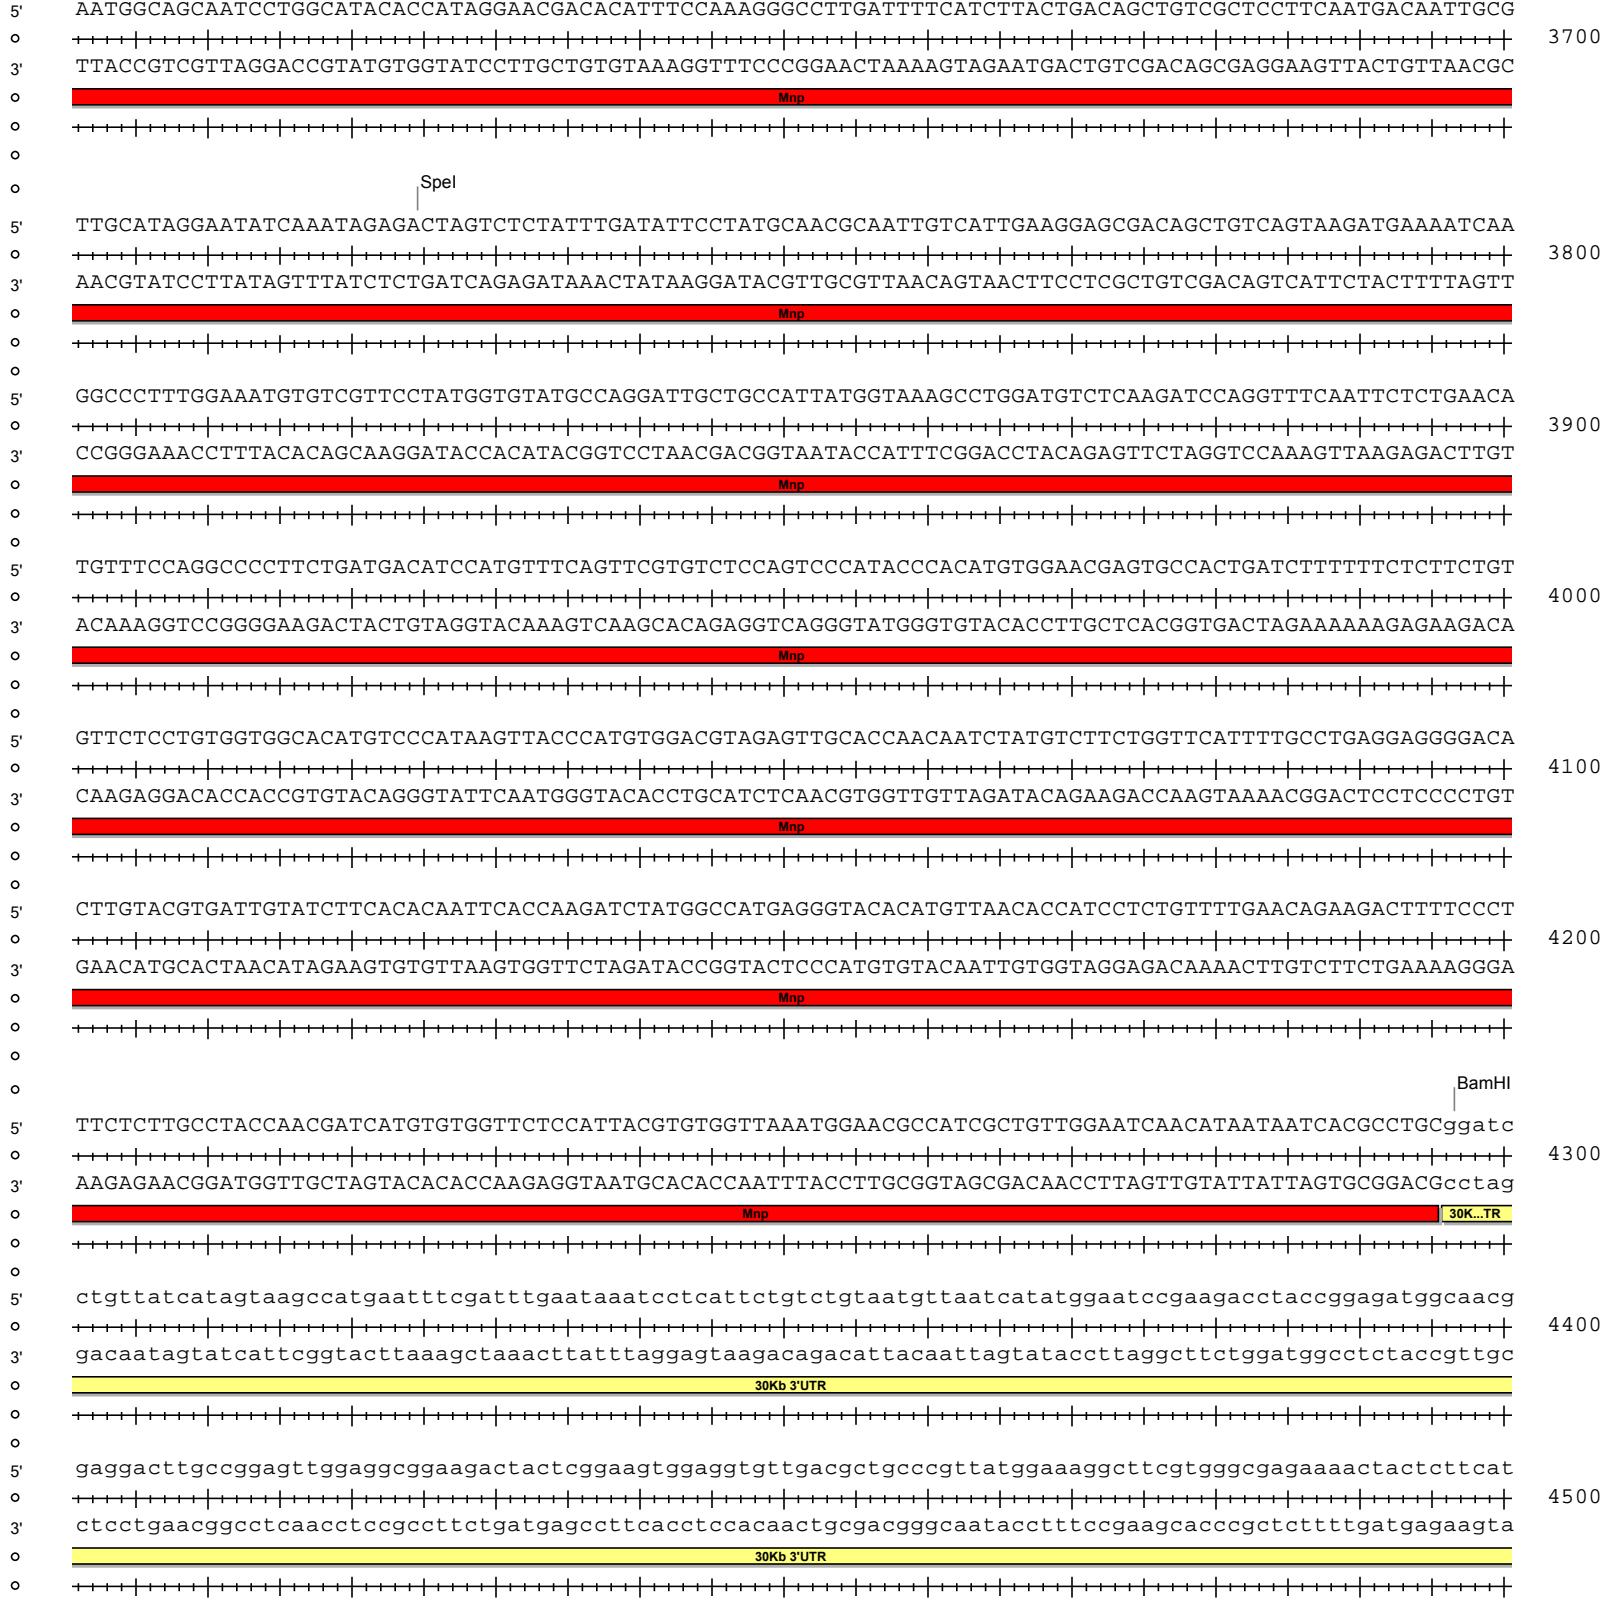

pMos30KExGM

5' gggcattttcgaccaaaatgctactgatccgtgaggggaaccgaagacctaccggagatggcaacggaggacttgccggagttggagggcgaagactactc  
 0 ++++++  
 3' cccgtaaaagctggttttacgatgactaggcactcccttggcttctggatggcctctaccgctgectcctgaacggcctcaacctccgccttctgatgag

4600

30Kb 3'UTR

5' ggaagtggaggtgttgacgctgcccgttatgaaaggcttctggtggcgagaaaactactcttcatgggcattttcgaccaaaatgctactgatccgtgag  
 0 ++++++  
 3' ccttcacctccacaactgcgacgggcaatacctttccgaagcaccgcctcttttgatgagaagtaccgtaaaagctggttttacgatgactaggcactc

4700

30Kb 3'UTR

5' ggaacgtgggaattcGGCCGGCCTAGGCGCGCC  
 0 ++++++  
 3' ccttgacccttaagCCGGCCGATCCGCGCGG

4733

EcoRI

Ascl

30Kb 3'UTR
