# Supplementary material
Source: PubMed Central journal article supplement (PMC4024861)

S2

A

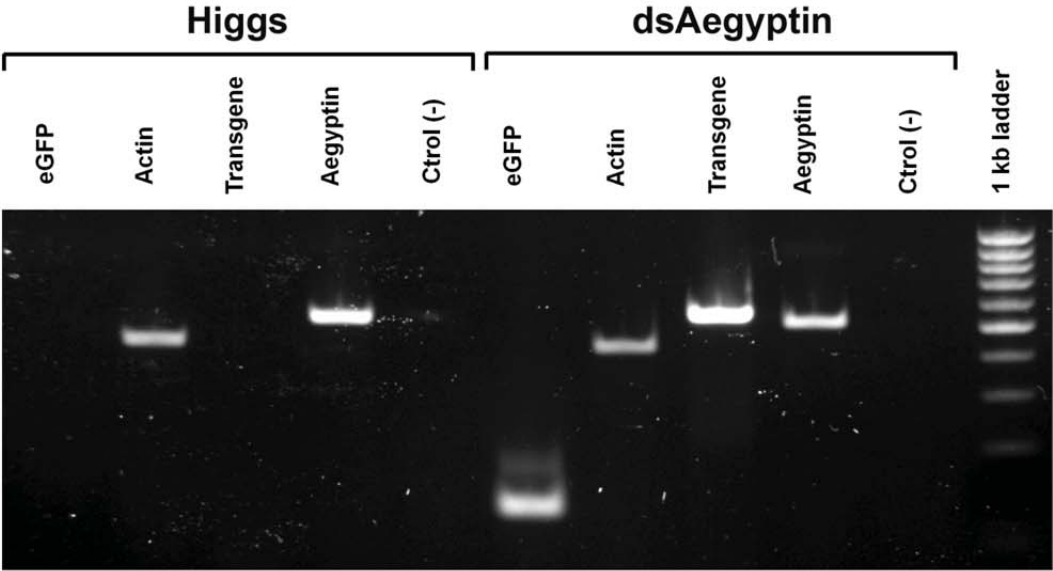

B

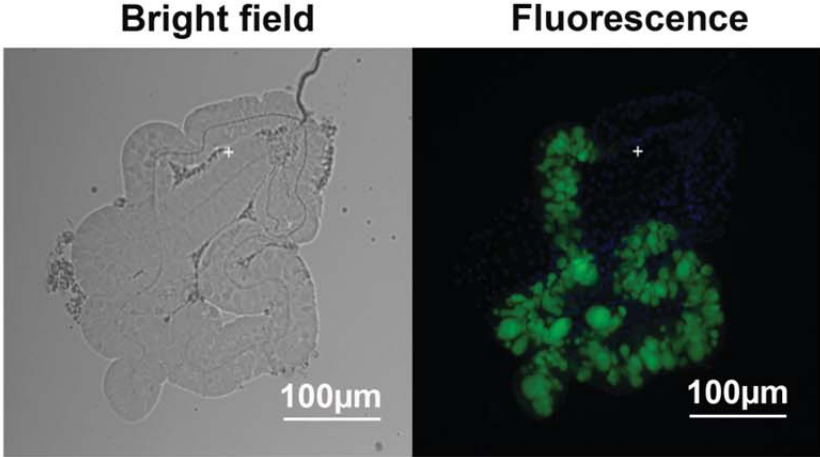

C

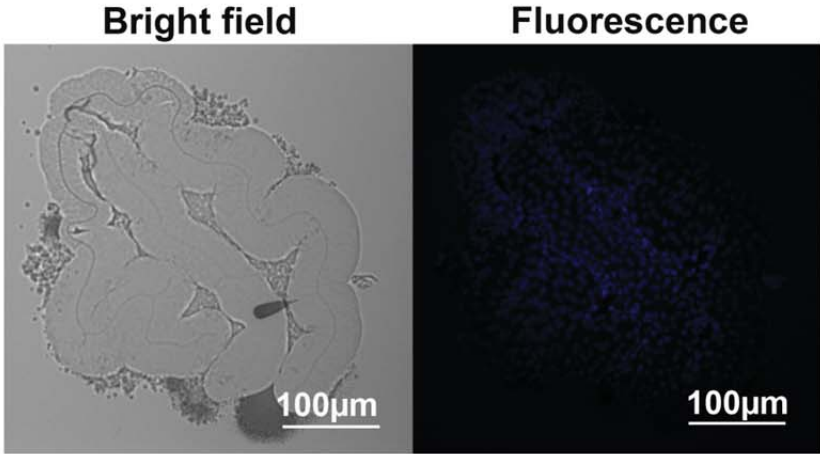

Supplement: 1404179111_pnas.1404179111.sfig02.pdf [file 1404179111_pnas.1404179111.sfig02.pdf]
